# Supplementary material for: Bacterial Toxins from Staphylococcus aureus and Bordetella bronchiseptica Predispose the Horse’s Respiratory Tract to Equine Herpesvirus Type 1 Infection
Source: MDPI journal article supplement (doi:10.3390/v14010149), 2022-01-14
Supplement: s1 [file s1]

## Supplementary information

### Bacterial toxins from *Staphylococcus aureus* and *Bordetella bronchiseptica* predispose the horse's respiratory tract to equine herpesvirus type 1 infection

Van Crombrugge, E., Vanbeylen, E., Van Cleemput, J., Van den Broeck, W., Laval, K. and Nauwynck, H.J.

## Supplementary figures

Cell death in the respiratory epithelium

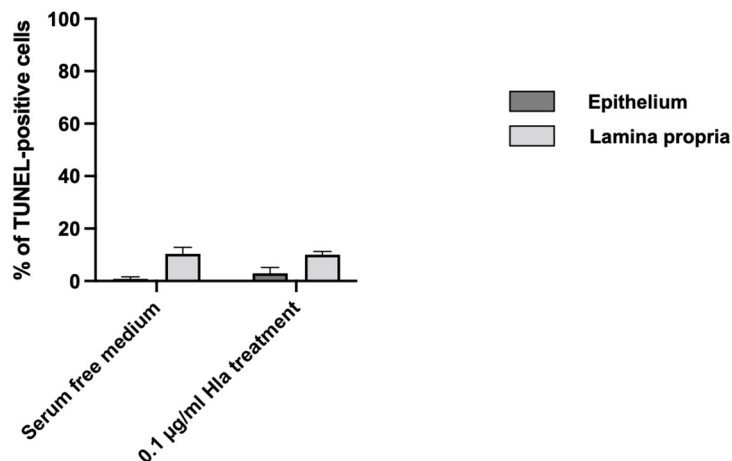

Cell death in the respiratory epithelium

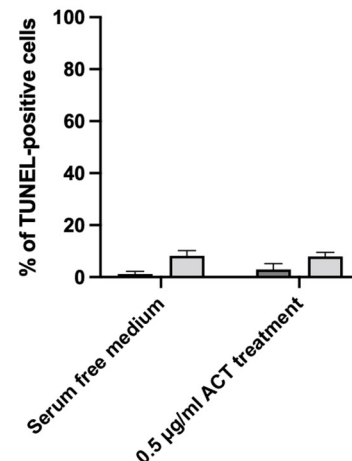

**Figure S1. Cell viability in respiratory mucosal explants**

The viability of the respiratory mucosa (epithelium and lamina propria) after treatment with the Hla (left) and ACT (right) toxins was assessed by means of TUNEL stainings. Data are represented as mean values + SD of triplicate independent experiments. No substantial increase in the amount of TUNEL-positive cells was observed in the respiratory mucosa (i.e. epithelium and lamina propria) after treatment with 0.1 µg/ml Hla toxin or 0.5 µg/ml ACT toxin.
